# Supplementary material for: Differential Detection of Alternaria alternata Haplotypes Isolated from Carya illinoinensis Using PCR-RFLP Analysis of Alt a1 Gene Region
Source: MDPI journal article supplement (doi:10.3390/genes14051115), 2023-05-20
Supplement: s1 [file s1]

**Supplementary Table S1.** Details on information of *Alternaria alternata* isolates used in this study (2017 -2019)

| Number | <i>A. alternata</i><br>isolates | Location | Coordinates                  | Pecan Substrates          |
|--------|---------------------------------|----------|------------------------------|---------------------------|
| 1      | CGJM3112                        | Gauteng  | 25°35'13.6"S 28°33'31.6"E    | Symptomatic Nuts-in-shuck |
| 2      | CGJM3028                        | Gauteng  | 25°35'13.6"S 28°33'31.6"E    | Symptomatic Leaves        |
| 3      | CGJM3026                        | Gauteng  | 25°35'13.6"S 28°33'31.6"E    | Symptomatic Leaves        |
| 4      | CGJM3125                        | Gauteng  | 25°35'13.6"S 28°33'31.6"E    | Symptomatic Leaves        |
| 5      | CGJM3136                        | Gauteng  | 25°35'13.6"S 28°33'31.6"E    | Symptomatic Shoots        |
| 6      | CGJM3097                        | Gauteng  | 25°35'13.6"S 28°33'31.6"E    | Symptomatic Leaves        |
| 7      | CGJM3105                        | Limpopo  | 24°40'40.5"S 28°29'55.6"E    | Symptomatic Leaves        |
| 8      | CGJM3053                        | Limpopo  | 24°40'40.5"S 28°29'55.6"E    | Symptomatic Nuts-in-shuck |
| 9      | CGJM3119                        | Limpopo  | 24°40'40.5"S 28°29'55.6"E    | Symptomatic Shoots        |
| 10     | CGJM3057                        | Limpopo  | 24°40'40.5"S 28°29'55.6"E    | Symptomatic Shoots        |
| 11     | CGJM2955                        | Limpopo  | 24°40'40.5"S 28°29'55.6"E    | Symptomatic Shoots        |
| 12     | CGJM3109                        | Limpopo  | 24°40'40.5"S 28°29'55.6"E    | Symptomatic Leaves        |
| 13     | CGJM3126                        | Limpopo  | 24°40'40.5"S 28°29'55.6"E    | Symptomatic Leaves        |
| 14     | CGJM3120                        | Limpopo  | 24°40'40.5"S 28°29'55.6"E    | Symptomatic Leaves        |
| 15     | CGJM3128                        | Limpopo  | 24°40'40.5"S 28°29'55.6"E    | Symptomatic Leaves        |
| 16     | CGJM3154                        | Limpopo  | 24°40'40.5"S 28°29'55.6"E    | Symptomatic Leaves        |
| 17     | CGJM3067                        | Limpopo  | 24°40'40.5"S 28°29'55.6"E    | Symptomatic Leaves        |
| 18     | CGJM3091                        | Limpopo  | 24°40'40.5"S 28°29'55.6"E    | Symptomatic Leaves        |
| 19     | CGJM3084                        | Limpopo  | 24°40'40.5"S 28°29'55.6"E    | Symptomatic Leaves        |
| 20     | CGJM3160                        | Limpopo  | 24°40'40.5"S 28°29'55.6"E    | Symptomatic Leaves        |
| 21     | CGJM3123                        | Limpopo  | 24°40'40.5"S 28°29'55.6"E    | Symptomatic Leaves        |
| 22     | CGJM3124                        | Limpopo  | S 23 05'12.1" E 030 10'50.0" | Symptomatic Leaves        |
| 23     | CGJM3064                        | Limpopo  | S 23 05'12.1" E 030 10'50.0" | Symptomatic Leaves        |
| 24     | CGJM3070                        | Limpopo  | S 23 05'12.1" E 030 10'50.0" | Symptomatic Leaves        |
| 25     | CGJM3061                        | Limpopo  | S 23 05'06.3 E 030 11 05.6"  | Symptomatic Leaves        |
| 26     | CGJM3017                        | Limpopo  | S 23 05'06.3 E 030 11 05.6"  | Symptomatic Leaves        |
| 27     | CGJM2985                        | Limpopo  | S 23 05'06.3 E 030 11 05.6"  | Symptomatic Leaves        |
| 28     | CGJM3005                        | Limpopo  | S 23 05'06.3 E 030 11 05.6"  | Symptomatic Leaves        |
| 29     | CGJM3047                        | Limpopo  | 24°25'42.1"S 28°35'41.0"E    | Symptomatic Shoots        |
| 30     | CGJM3111                        | Limpopo  | 24°25'42.1"S 28°35'41.0"E    | Symptomatic Shoots        |
| 31     | CGJM2965                        | Limpopo  | 24°25'42.1"S 28°35'41.0"E    | Symptomatic Leaves        |
| 32     | CGJM3114                        | Limpopo  | 24°25'42.1"S 28°35'41.0"E    | Symptomatic Leaves        |
| 33     | CGJM3101                        | Limpopo  | 24°25'42.1"S 28°35'41.0"E    | Symptomatic Leaves        |
| 34     | CGJM3040                        | Limpopo  | 24°25'42.1"S 28°35'41.0"E    | Symptomatic Leaves        |
| 35     | CGJM2978                        | Limpopo  | 24°25'42.1"S 28°35'41.0"E    | Symptomatic Leaves        |
| 36     | CGJM3051                        | Limpopo  | 24°25'42.1"S 28°35'41.0"E    | Symptomatic Leaves        |
| 37     | CGJM3024                        | Limpopo  | 24°25'42.1"S 28°35'41.0"E    | Symptomatic Leaves        |
| 38     | CGJM3050                        | Limpopo  | 24°25'42.1"S 28°35'41.0"E    | Symptomatic Leaves        |
| 39     | CGJM3100                        | Limpopo  | 24°25'42.1"S 28°35'41.0"E    | Symptomatic Leaves        |
| 40     | CGJM3099                        | Limpopo  | 24°25'42.1"S 28°35'41.0"E    | Symptomatic Leaves        |
| 41     | CGJM2959                        | Limpopo  | 24°25'42.1"S 28°35'41.0"E    | Symptomatic Leaves        |

|    |          |               |                              |                           |
|----|----------|---------------|------------------------------|---------------------------|
| 42 | CGJM2958 | Limpopo       | 24°25'42.1"S 28°35'41.0"E    | Symptomatic Leaves        |
| 43 | CGJM3027 | Limpopo       | 24°25'42.1"S 28°35'41.0"E    | Symptomatic Leaves        |
| 44 | CGJM3108 | Limpopo       | 29°36'59.8"S 30°27'53.6"E    | Symptomatic Nuts-in-shuck |
| 45 | CGJM3132 | Limpopo       | 29°36'59.8"S 30°27'53.6"E    | Symptomatic Shoots        |
| 46 | CGJM3138 | Limpopo       | 29°36'59.8"S 30°27'53.6"E    | Symptomatic Leaves        |
| 47 | CGJM2954 | Limpopo       | 29°36'59.8"S 30°27'53.6"E    | Symptomatic Leaves        |
| 48 | CGJM2989 | Limpopo       | 29°36'59.8"S 30°27'53.6"E    | Symptomatic Leaves        |
| 49 | CGJM3069 | Limpopo       | 29°36'59.8"S 30°27'53.6"E    | Symptomatic Leaves        |
| 50 | CGJM2964 | Limpopo       | 29°36'59.8"S 30°27'53.6"E    | Symptomatic Leaves        |
| 51 | CGJM2984 | Limpopo       | 29°36'59.8"S 30°27'53.6"E    | Symptomatic Leaves        |
| 52 | CGJM3062 | Limpopo       | 29°36'59.8"S 30°27'53.6"E    | Symptomatic Leaves        |
| 53 | CGJM3063 | Limpopo       | 29°36'59.8"S 30°27'53.6"E    | Symptomatic Leaves        |
| 54 | CGJM3033 | Limpopo       | 29°36'59.8"S 30°27'53.6"E    | Symptomatic Leaves        |
| 55 | CGJM3127 | Limpopo       | 29°36'59.8"S 30°27'53.6"E    | Symptomatic Leaves        |
| 56 | CGJM2976 | Limpopo       | 29°36'59.8"S 30°27'53.6"E    | Symptomatic Leaves        |
| 57 | CGJM3016 | Limpopo       | 29°36'59.8"S 30°27'53.6"E    | Symptomatic Leaves        |
| 58 | CGJM3092 | Limpopo       | 29°36'59.8"S 30°27'53.6"E    | Symptomatic Leaves        |
| 59 | CGJM1A   | Limpopo       | 29°36'59.8"S 30°27'53.6"E    | Symptomatic Leaves        |
| 60 | CGJM1B   | Limpopo       | 29°36'59.8"S 30°27'53.6"E    | Symptomatic Leaves        |
| 61 | CGJM1C   | Limpopo       | 24°40'40.5"S 28°29'55.6"E    | Symptomatic Shoots        |
| 62 | CGJM1D   | Limpopo       | 24°25'42.1"S 28°35'41.0"E    | Symptomatic Leaves        |
| 63 | CGJM1E   | Limpopo       | 24°25'42.1"S 28°35'41.0"E    | Symptomatic Leaves        |
| 64 | CGJM1F   | Limpopo       | 29°36'59.8"S 30°27'53.6"E    | Symptomatic Leaves        |
| 65 | CGJM2979 | Kwazulu-Natal | S 28 55'50.9" E 030 23'20.4" | Symptomatic Leaves        |
| 66 | CGJM3161 | Kwazulu-Natal | S 28 55'50.9" E 030 23'20.4" | Non-symptomatic Leaves    |
| 67 | CGJM2986 | Kwazulu-Natal | S 28 51'01.7" E 030 06'01.5" | Symptomatic Nuts-in-shuck |
| 68 | CGJM3032 | Kwazulu-Natal | S 28 51'01.7" E 030 06'01.5" | Symptomatic Nuts-in-shuck |
| 69 | CGJM3042 | Kwazulu-Natal | S 28 51'29.4" E 030 05'21.3" | Symptomatic Nuts-in-shuck |
| 70 | CGJM3079 | Kwazulu-Natal | S 27 36'39.3" E 031 28'55.2" | Symptomatic Shoots        |
| 71 | CGJM3082 | Kwazulu-Natal | S 27 23'17.4" E 031 49'15.4" | Symptomatic Shoots        |
| 72 | CGJM3038 | Mpumalanga    | S 25 25'41.3" E 030 56'15.2" | Symptomatic Leaves        |
| 73 | CGJM2980 | Mpumalanga    | S 25 27'13.1" E 030 56'40.8" | Symptomatic Leaves        |
| 74 | CGJM1I   | Mpumalanga    | S 25 27'13.1" E 030 56'40.8" | Symptomatic Leaves        |
| 75 | CGJM3162 | Eastern Cape  | S 32 01'42.4" E 025 32'52.7" | Symptomatic Nuts-in-shuck |
| 76 | CGJM3085 | Eastern Cape  | S 32 01'42.4" E 025 32'52.7" | Symptomatic Shoots        |
| 77 | CGJM3083 | Eastern Cape  | S 32 01'42.4" E 025 32'52.7" | Non-symptomatic Leaves    |
| 78 | CGJM3093 | Eastern Cape  | S 32 01'42.4" E 025 32'52.7" | Non-symptomatic Leaves    |
| 79 | CGJM3049 | Eastern Cape  | S 32 01'42.4" E 025 32'52.7" | Symptomatic Leaves        |
| 80 | CGJM3037 | Eastern Cape  | S 32 11'57.5" E 025 38'20.9" | Symptomatic Leaves        |
| 81 | CGJM3052 | Eastern Cape  | S 32 11'57.5" E 025 38'20.9" | Symptomatic Leaves        |
| 82 | CGJM3048 | Eastern Cape  | S 32 11'57.5" E 025 38'20.9" | Symptomatic Leaves        |
| 83 | CGJM3163 | Eastern Cape  | S 32 11'57.5" E 025 38'20.9" | Symptomatic Leaves        |
| 84 | CGJM3115 | Eastern Cape  | S 32 11'57.5" E 025 38'20.9" | Symptomatic Leaves        |
| 85 | CGJM3131 | Eastern Cape  | S 32 11'57.5" E 025 38'20.9" | Symptomatic Leaves        |
| 86 | CGJM3164 | Eastern Cape  | S 32 11'57.5" E 025 38'20.9" | Symptomatic Leaves        |
| 87 | CGJM3165 | Eastern Cape  | S 32 11'57.5" E 025 38'20.9" | Symptomatic Leaves        |
| 88 | CGJM3045 | Eastern Cape  | S 32 11'57.5" E 025 38'20.9" | Symptomatic Leaves        |

|     |          |              |                              |                           |
|-----|----------|--------------|------------------------------|---------------------------|
| 89  | CGJM3065 | Eastern Cape | S 32 11'57.5" E 025 38'20.9" | Symptomatic Leaves        |
| 90  | CGJM3039 | Eastern Cape | S 30 39'49.6" E 026 49'36.7" | Symptomatic Nuts-in-shuck |
| 91  | CGJM3030 | Eastern Cape | S 30 39'49.6" E 026 49'36.7" | Symptomatic Leaves        |
| 92  | CGJM3174 | Eastern Cape | S 32 11'57.5" E 025 38'20.9" | Non-symptomatic Leaves    |
| 93  | CGJM3158 | Eastern Cape | S 32 42'23.5" E 026 17'16.8" | Symptomatic Leaves        |
| 94  | CGJM3159 | Eastern Cape | S 32 44'33.9" E 025 36'57.2" | Non-symptomatic Leaves    |
| 95  | CGJM3175 | Eastern Cape | S 32 44'29.3" E 025 36'15.6" | Symptomatic Shoots        |
| 96  | CGJM3155 | Eastern Cape | S 30 39'49.6" E 026 49'36.7" | Symptomatic Nuts-in-shuck |
| 97  | CGJM1G   | Eastern Cape | S 30 39'49.6" E 026 49'36.7" | Symptomatic Leaves        |
| 98  | CGJM3042 | North West   | S 25 47'24.5" E 027 45'53.1" | Non-symptomatic Leaves    |
| 99  | CGJM3166 | North West   | S 25 47'22.3" E 027 45'50.3" | Non-symptomatic Leaves    |
| 100 | CGJM3141 | North West   | S 25 13'19.1" E 027 32'02.5" | Non-symptomatic Leaves    |
| 101 | CGJM3054 | North West   | S 25 13'19.1" E 027 32'02.5" | Non-symptomatic Leaves    |
| 102 | CGJM3055 | North West   | S 25 13'19.1" E 027 32'02.5" | Non-symptomatic Leaves    |
| 103 | CGJM3073 | North West   | S 25 13'19.1" E 027 32'02.5" | Non-symptomatic Leaves    |
| 104 | CGJM2983 | North West   | S 25 13'19.1" E 027 32'02.5" | Non-symptomatic Leaves    |
| 105 | CGJM2956 | North West   | S25 31'12.9" E 027 47'55.7"  | Non-symptomatic Leaves    |
| 106 | CGJM3046 | North West   | S 25 31'22.2" E 027 47'45.0" | Non-symptomatic Leaves    |
| 107 | CGJM3034 | North West   | S25 31'12.9" E 027 47'55.7"  | Non-symptomatic Leaves    |
| 108 | CGJM3139 | North West   | S 25 31'22.2" E 027 47'45.0" | Non-symptomatic Leaves    |
| 109 | CGJM3041 | North West   | S25 31'12.9" E 027 47'55.7"  | Non-symptomatic Leaves    |
| 110 | CGJM3029 | North West   | S 25 31'22.2" E 027 47'45.0" | Non-symptomatic Leaves    |
| 111 | CGJM3130 | North West   | S 25 32'41.1" E 027 48'57.6" | Non-symptomatic Leaves    |
| 112 | CGJM3071 | North West   | S 25 32'40.7" E 027 48'56.5" | Symptomatic Leaves        |
| 113 | CGJM3072 | North West   | S 25 32'41.1" E 027 48'57.6" | Symptomatic Leaves        |
| 114 | CGJM3168 | North West   | S 25 32'40.7" E 027 48'56.5" | Symptomatic Leaves        |
| 115 | CGJM3104 | North West   | S 25 32'41.1" E 027 48'57.6" | Symptomatic Leaves        |
| 116 | CGJM2977 | North West   | S 25 32'41.1" E 027 48'57.6" | Symptomatic Leaves        |
| 117 | CGJM3096 | North West   | S 25 32'40.7" E 027 48'56.5" | Non-symptomatic Leaves    |
| 118 | CGJM3068 | North West   | S 27 14'27.4" E 026 09'39.3" | Non-symptomatic Leaves    |
| 119 | CGJM3177 | North West   | S 27 14'27.4" E 026 09'39.3" | Symptomatic Leaves        |
| 120 | CGJM3002 | North West   | S 27 14'27.4" E 026 09'39.3" | Symptomatic Leaves        |
| 121 | CGJM3003 | North West   | S 27 14'27.4" E 026 09'39.3" | Symptomatic Leaves        |
| 122 | CGJM3145 | North West   | S 27 14'27.4" E 026 09'39.3" | Symptomatic Leaves        |
| 123 | CGJM2973 | North West   | S 27 14'27.4" E 026 09'39.3" | Symptomatic Leaves        |
| 124 | CGJM2974 | North West   | S 27 14'27.4" E 026 09'39.3" | Symptomatic Leaves        |
| 125 | CGJM2975 | North West   | S 27 14'27.4" E 026 09'39.3" | Symptomatic Leaves        |
| 126 | CGJM3153 | North West   | S 27 14'27.4" E 026 09'39.3" | Symptomatic Leaves        |
| 127 | CGJM3007 | North West   | S 27 14'27.4" E 026 09'39.3" | Symptomatic Leaves        |
| 128 | CGJM3169 | North West   | S 27 14'27.4" E 026 09'39.3" | Symptomatic Leaves        |
| 129 | CGJM3008 | North West   | S 27 14'27.4" E 026 09'39.3" | Symptomatic Leaves        |
| 130 | CGJM3009 | North West   | S 27 14'27.4" E 026 09'39.3" | Symptomatic Leaves        |
| 131 | CGJM2960 | North West   | S 27 14'27.4" E 026 09'39.3" | Symptomatic Leaves        |
| 132 | CGJM2952 | North West   | S 27 14'27.4" E 026 09'39.3" | Non-symptomatic Leaves    |
| 133 | CGJM2961 | North West   | S 27 14'27.4" E 026 09'39.3" | Non-symptomatic Leaves    |
| 134 | CGJM2962 | North West   | S 27 14'27.4" E 026 09'39.3" | Non-symptomatic Leaves    |
| 135 | CGJM2963 | North West   | S 27 14'27.4" E 026 09'39.3" | Non-symptomatic Leaves    |

|     |          |            |                               |                           |
|-----|----------|------------|-------------------------------|---------------------------|
| 136 | CGJM2953 | North West | S 27 14'27.4" E 026 09'39.3"  | Non-symptomatic Leaves    |
| 137 | CGJM2970 | North West | S 27 14'27.4" E 026 09'39.3"  | Non-symptomatic Leaves    |
| 138 | CGJM3129 | North West | S 26 24'01.0" E 026 12' 32.6" | Non-symptomatic Leaves    |
| 139 | CGJM3001 | North West | S 26 24'01.0" E 026 12' 32.6" | Symptomatic Leaves        |
| 140 | CGJM2995 | North West | S 26 24'01.0" E 026 12' 32.6" | Symptomatic Leaves        |
| 141 | CGJM2992 | North West | S 26 24'01.0" E 026 12' 32.6" | Symptomatic Leaves        |
| 142 | CGJM2968 | North West | S 26 24'01.0" E 026 12' 32.6" | Symptomatic Leaves        |
| 143 | CGJM2971 | North West | S 26 24'01.0" E 026 12' 32.6" | Symptomatic Leaves        |
| 144 | CGJM2994 | North West | S 26 24'01.0" E 026 12' 32.6" | Symptomatic Leaves        |
| 145 | CGJM3011 | North West | S 26 24'01.0" E 026 12' 32.6" | Symptomatic Leaves        |
| 146 | CGJM3018 | North West | S 26 24'01.0" E 026 12' 32.6" | Symptomatic Leaves        |
| 147 | CGJM3014 | North West | S 26 24'01.0" E 026 12' 32.6" | Symptomatic Leaves        |
| 148 | CGJM3015 | North West | S 26 24'01.0" E 026 12' 32.6" | Symptomatic Leaves        |
| 149 | CGJM3013 | North West | S 26 24'01.0" E 026 12' 32.6" | Symptomatic Leaves        |
| 150 | CGJM3019 | North West | S 26 24'01.0" E 026 12' 32.6" | Symptomatic Leaves        |
| 151 | CGJM2990 | North West | S 26 24'01.0" E 026 12' 32.6" | Symptomatic Leaves        |
| 152 | CGJM2993 | North West | S 26 35'05.1" E 026 33'18.8"  | Symptomatic Leaves        |
| 153 | CGJM3010 | North West | S 26 24'01.0" E 026 12' 32.6" | Symptomatic Leaves        |
| 154 | CGJM3118 | North West | S 26 24'01.0" E 026 12' 32.6" | Symptomatic Leaves        |
| 155 | CGJM2996 | North West | S 26 35'05.1" E 026 33'18.8"  | Non-symptomatic Leaves    |
| 156 | CGJM2998 | North West | S 26 35'05.1" E 026 33'18.8"  | Non-symptomatic Leaves    |
| 157 | CGJM2999 | North West | S 26 35'05.1" E 026 33'18.8"  | Non-symptomatic Leaves    |
| 158 | CGJM3035 | North West | S 26 35'05.1" E 026 33'18.8"  | Symptomatic Leaves        |
| 159 | CGJM2982 | North West | S 26 35'05.1" E 026 33'18.8"  | Symptomatic Leaves        |
| 160 | CGJM3020 | North West | S 26 35'05.1" E 026 33'18.8"  | Symptomatic Leaves        |
| 161 | CGJM3077 | North West | S 26 35'05.1" E 026 33'18.8"  | Symptomatic Leaves        |
| 162 | CGJM3000 | North West | S 26 35'05.1" E 026 33'18.8"  | Symptomatic Leaves        |
| 163 | CGJM3023 | North West | S 26 35'05.1" E 026 33'18.8"  | Non-symptomatic Leaves    |
| 164 | CGJM3022 | North West | S 26 35'05.1" E 026 33'18.8"  | Non-symptomatic Leaves    |
| 165 | CGJM3004 | North West | S 26 35'05.1" E 026 33'18.8"  | Symptomatic Shoots        |
| 166 | CGJM3106 | North West | S 26 47'35.1" E 026 14'37.9"  | Symptomatic Leaves        |
| 167 | CGJM3012 | North West | S 26 47'35.1" E 026 14'37.9"  | Symptomatic Leaves        |
| 168 | CGJM3075 | North West | S 26 47'35.1" E 026 14'37.9"  | Symptomatic Leaves        |
| 169 | CGJM3086 | North West | S 26 35'05.1" E 026 33'18.8"  | Non-symptomatic Leaves    |
| 170 | CGJM3156 | North West | S 25 57'23.7" E 027 24'49.8"  | Non-symptomatic Leaves    |
| 171 | CGJM3152 | North West | S 25 57'23.7" E 027 24'49.8"  | Non-symptomatic Leaves    |
| 172 | CGJM3157 | North West | S 25 46'47.7" E 027 45'43.3"  | Non-symptomatic Leaves    |
| 173 | CGJM3116 | North West | S 25 46'47.7" E 027 45'43.3"  | Non-symptomatic Leaves    |
| 174 | CGJM3133 | North West | S 25 47'41.0" E 027 45'40.7"  | Non-symptomatic Leaves    |
| 175 | CGJM3151 | North West | S 25 47'41.0" E 027 45'40.7"  | Non-symptomatic Leaves    |
| 176 | CGJM3171 | North West | S 25 47'06.7" E 027 44'53.6"  | Symptomatic Nuts-in-shuck |
| 177 | CGJM3172 | North West | S 25 13'19.1" E 027 32'02.5"  | Symptomatic Leaves        |
| 178 | CGJM3107 | North West | S 25 13'19.1" E 027 32'02.5"  | Non-symptomatic Leaves    |
| 179 | CGJM3135 | North West | S 25 13'19.1" E 027 32'02.5"  | Non-symptomatic Leaves    |
| 180 | CGJM3088 | North West | S 26 35'05.1" E 026 33'18.8"  | Symptomatic Leaves        |
| 181 | CGJM3094 | North West | S 26 35'05.1" E 026 33'18.8"  | Symptomatic Leaves        |
| 182 | CGJM3176 | North West | S 26 51'04.6" E 026 13'40.1"  | Symptomatic Leaves        |

|     |          |               |                              |                           |
|-----|----------|---------------|------------------------------|---------------------------|
| 183 | CGJM3081 | North West    | S 26 35'05.1" E 026 33'18.8" | Symptomatic Leaves        |
| 184 | CGJM3143 | North West    | S 26 35'05.1" E 026 33'18.8" | Symptomatic Leaves        |
| 185 | CGJM1H   | North West    | S 26 35'05.1" E 026 33'18.8" | Non-symptomatic Leaves    |
| 186 | CGJM3170 | Free State    | S 26 53'17.2" E 027 23'23.9" | Non-symptomatic Leaves    |
| 187 | CGJM3117 | Free State    | S 26 53'17.2" E 027 23'23.9" | Non-symptomatic Leaves    |
| 188 | CGJM3146 | Free State    | S 26 53'17.2" E 027 23'23.9" | Non-symptomatic Leaves    |
| 189 | CGJM3134 | Free State    | S 26 51'48.9" E 027 17'45.6" | Symptomatic Nuts-in-shuck |
| 190 | CGJM3150 | Free State    | S 26 51'48.9" E 027 17'45.6" | Symptomatic Nuts-in-shuck |
| 191 | CGJM3149 | Free State    | S 26 51'48.9" E 027 17'45.6" | Symptomatic Nuts-in-shuck |
| 192 | CGJM3173 | Free State    | S 26 51'39.4" E 027 17'52.6" | Symptomatic Leaves        |
| 193 | CGJM3148 | Free State    | S 26 51'39.4" E 027 17'52.6" | Symptomatic Leaves        |
| 194 | CGJM3147 | Free State    | S 26 51'39.4" E 027 17'52.6" | Symptomatic Leaves        |
| 195 | CGJM3535 | Northern Cape | S 27 39'53.1" E 024 44'09.4" | Symptomatic Leaves        |
| 196 | CGJM3536 | Northern Cape | S 27 40'41.4" E 024 46'42.6" | Non-symptomatic Leaves    |
| 197 | CGJM3537 | Northern Cape | S 27 39'53.1" E 024 44'09.4" | Symptomatic Nuts-in-shuck |
| 198 | CGJM3538 | Northern Cape | S 27 40'41.4" E 024 46'42.6" | Symptomatic Nuts-in-shuck |
| 199 | CGJM3539 | Northern Cape | S 29 10'49.0" E 023 43'28.3" | Non-symptomatic Leaves    |
| 200 | CGJM3540 | Northern Cape | S 29 10'49.0" E 023 43'28.3" | Non-symptomatic Leaves    |
| 201 | CGJM3541 | Northern Cape | S 29 08'53.7" E 023 42'29.7" | Symptomatic Leaves        |
| 202 | CGJM3542 | Northern Cape | S 29 08'53.7" E 023 42'29.7" | Symptomatic Leaves        |
| 203 | CGJM3543 | Northern Cape | S 29 00'30.0" E 023 52'03.9" | Non-symptomatic Leaves    |
| 204 | CGJM3544 | Northern Cape | S 29 01'04.2" E 023 53'03.3" | Symptomatic Leaves        |
| 205 | CGJM3545 | Northern Cape | S 29 00'55.2" E 023 52'44.6" | Symptomatic Nuts-in-shuck |
| 206 | CGJM3546 | Northern Cape | S 29 00'51.5" E 023 52'41.2" | Symptomatic Shoots        |
| 207 | CGJM3547 | Northern Cape | S 29 35'24.0" E 022 54'07.9" | Non-symptomatic Leaves    |
| 208 | CGJM3548 | Northern Cape | S 29 35'24.0" E 022 54'07.9" | Symptomatic Leaves        |
| 209 | CGJM3549 | Northern Cape | S 29 35'24.0" E 022 54'07.9" | Symptomatic Nuts-in-shuck |
| 210 | CGJM3550 | Northern Cape | S 29 39'32.3" E 022 46'31.8" | Non-symptomatic Leaves    |
| 211 | CGJM3551 | Northern Cape | S 29 39'32.3" E 022 46'31.8" | Symptomatic Leaves        |
| 212 | CGJM3552 | Northern Cape | S 29 39'32.3" E 022 46'31.8" | Symptomatic Shoots        |
| 213 | CGJM3553 | Northern Cape | S 29 34'20.5" E 022 51'31.2" | Symptomatic Leaves        |
| 214 | CGJM3554 | Northern Cape | S 29 48'49.5 E 024 24'34.3"  | Symptomatic Leaves        |
| 215 | CGJM3555 | Northern Cape | S 29 48'49.5 E 024 24'34.3"  | Symptomatic Leaves        |
| 216 | CGJM3556 | Northern Cape | S 29 50'26.3" E 024 22'52.3" | Non-symptomatic Leaves    |
| 217 | CGJM3557 | Northern Cape | S 29 50'26.3" E 024 22'52.3" | Non-symptomatic Leaves    |
| 218 | CGJM3558 | Northern Cape | S 29 50'26.3" E 024 22'52.3" | Symptomatic Leaves        |
| 219 | CGJM3559 | Northern Cape | S 29 50'26.3" E 024 22'52.3" | Symptomatic Nuts-in-shuck |
| 220 | CGJM3560 | Northern Cape | S 27 54'20.7" E 024 51'31.8" | Symptomatic Shoots        |
| 221 | CGJM3561 | Northern Cape | S 27 54'20.7" E 024 51'31.8" | Symptomatic Shoots        |
| 222 | CGJM3562 | Northern Cape | S 28 30'58.1" E 021 43'38.5" | Symptomatic Leaves        |

---

**Supplementary Table S2.** *Alternaria* isolates used for phylogenetic analysis in this study and their GenBank accession number (Woudenberg et al 2015)

| Species name and strain number <sup>1,2</sup>                  | Locality, host / substrate   | GenBank<br>accession<br>numbers |
|----------------------------------------------------------------|------------------------------|---------------------------------|
|                                                                |                              | <i>Alt a 1</i>                  |
| <b><i>Alternaria alstroemeriae</i></b>                         |                              |                                 |
| CBS 118808; E.G.S. 50.116R                                     | USA, Alstroemeria sp.        | KP123845                        |
| <b><i>Alternaria alternata</i></b>                             |                              |                                 |
| CBS 106.24; E.G.S. 38.029; ATCC 13963 (A. maliT)               | USA, Malus sylvestris        | KP123847                        |
| CBS 104.26                                                     | Unknown, unknown             | KP123848                        |
| CBS 107.27; ATCC 24463; QM 1736 (A. citri)                     | USA, Citrus limonium         | KP123849                        |
| CBS 154.31; IHEM 3320                                          | USA, Staphylea trifolia      | KP123851                        |
| CBS 103.33; E.G.S. 35.182; IHEM 3319 (A. soliaegyptiacaT)      | Egypt, soil                  | KP123852                        |
| CBS 106.34; E.G.S. 06.198; DSM 62019; MUCL 10030 (A. liniT)    | Unknown, Linum usitatissimum | KP123853                        |
| CBS 102.47; E.G.S. 02.062 (A. citriR)                          | USA, Citrus sinensis         | KP123855                        |
| CBS 174.52; E.G.S. 39.1613; IMI 068086; QM 1278                | USA, Anemone occidentalis    | KP123856                        |
| CBS 175.52; E.G.S. 35.1619; IMI 068085; QM 1277                | USA, Juncus mertensianus     | KP123857                        |
| CBS 107.53; DSM 3187; IFO 5778 (A. kikuchiana)                 | Japan, Pyrus pyrifolia       | KP123858                        |
| CBS 686.68; LCP 1988 (A. tenuissima)                           | Sahara, desert sand          | KP123859                        |
| CBS 612.72; DSM 62012 (A. cinerariae)                          | Germany, Senecio cineraria   | KP123861                        |
| CBS 267.77 (A. citri)                                          | USA, Citrus paradisi         | KP123864                        |
| CBS 603.78; E.G.S. 30.134; QM 9553                             | USA, air                     | KP123865                        |
| CBS 175.80 (A. septorioides)                                   | Italy, unknown               | KP123866                        |
| CBS 192.81 (A. citri)                                          | Egypt, Citrus sinensis       | KP123867                        |
| CBS 620.83; ATCC 15052 (A. tenuissima)                         | USA, Nicotiana tabacum       | KP123868                        |
| CBS 194.86; E.G.S. 04.090; QM 1347 (A. pulvinifungicolaT)      | USA, Quercus sp.             | KP123869                        |
| CBS 195.86; E.G.S. 36.172; DAOM 185214 (A. angustiovoideaT)    | Canada, Euphorbia esula      | JQ646398                        |
| CBS 447.86 (A. malvae)                                         | Marocco, Malva sp.           | JQ646397                        |
| CBS 479.90; E.G.S. 29.028 (A. pellucidaT)                      | Japan, Citrus unshiu         | KP123870                        |
| CBS 595.93 (A. rhadinaT)                                       | Japan, Pyrus pyrifolia       | JQ646399                        |
| CBS 877.95 (A. tenuissima)                                     | India, human, sinusitis      | KP123871                        |
| CBS 880.95; IMI 292915 (A. tenuissima)                         | Belgium, Fragaria vesca      | np                              |
| CBS 965.95; IMI 289679 (A. tenuissima)                         | India, Triticum sp.          | KP123872                        |
| CBS 966.95; IMI 79630 (A. tenuissima)                          | India, Solanum lycopersicum  | KP123873                        |
| CBS 806.96                                                     | Papua New Guinea, Cyperaceae | KP123874                        |
| CBS 916.96; E.G.S. 34.016; CBS 110977; CBS 115616; IMI 254138T | India, Arachis hypogaea      | AY563301                        |
| CBS 918.96; E.G.S. 34.015; IMI 255532 (A. tenuissimaR)         | UK, Dianthus chinensis       | AY563302                        |
| CBS 911.97; IMI 056271 (A. tenuissima)                         | India, Artemisia brevifolia  | KP123875                        |
| CBS 639.97; IMI 366417                                         | Greece, Helianthus annuus    | KP123876                        |
| CBS 102595; E.G.S. 45.100 (A. limoniasperaeT)                  | USA, Citrus jambhiri         | AY563306                        |
| CBS 102596; E.G.S. 45.090 (A. citrimaculatisT)                 | USA, Citrus jambhiri         | KP123877                        |
| CBS 102598; E.G.S. 46.141 (A. citriarbustiT)                   | USA, Minneola tangelo        | KP123878                        |
| CBS 102599; E.G.S. 44.166 (A. turkisafriaT)                    | Turkey, Minneola tangelo     | KP123879                        |
| CBS 102600; E.G.S. 39.181; ATCC 38963 (A. toxicogenicaT)       | USA, Citrus reticulata       | KP123880                        |
| CBS 102602; E.G.S. 44.160 (A. perangustaT)                     | Turkey, Minneola tangelo     | KP123881                        |

|                                                             |                                 |          |
|-------------------------------------------------------------|---------------------------------|----------|
| CBS 102603; E.G.S. 45.011 (A. interruptaT)                  | Israel, Minneola tangelo        | KP123882 |
| CBS 102604; E.G.S. 45.007 (A. dumosaT)                      | Israel, Minneola tangelo        | AY563305 |
| CBS 109455                                                  | Canada, human arm tissue        | KP123883 |
| CBS 109803                                                  | Germany, human skin             | KP123884 |
| CBS 110027                                                  | Germany, human eye              | KP123885 |
| CBS 110977; E.G.S. 34.016; CBS 916.96; CBS 115616T          | India, Arachis hypogaea         | AY563301 |
| CBS 112251 (A. arborescens)                                 | Unknown, unknown                | KP123887 |
| CBS 112252 (A. tenuissima)                                  | Unknown, unknown                | KP123888 |
| CBS 113013; CPC 4268 (A. tenuissima)                        | South Africa, Malus domestica   | KP123889 |
| CBS 113014; CPC 4260 (A. tenuissima)                        | South Africa, Malus domestica   | KP123890 |
| CBS 113015; CPC 4266 (A. tenuissima)                        | South Africa, Malus domestica   | KP123891 |
| CBS 113024; CPC 4334                                        | South Africa, Minneola tangelo  | KP123892 |
| CBS 113025; CPC 4342                                        | South Africa, Citrus clementina | KP123893 |
| CBS 113054; CPC 4263 (A. tenuissima)                        | South Africa, Malus domestica   | KP123894 |
| CBS 115069; CPC 4254 (A. tenuissima)                        | South Africa, Malus domestica   | KP123895 |
| CBS 115152; HKUCC 9099                                      | China, Psychotria serpens       | KP123896 |
| CBS 115188; CPC 4348                                        | South Africa, Citrus clementina | KP123897 |
| CBS 115190; CPC 4340                                        | South Africa, Citrus sinensis   | KP123898 |
| CBS 115199; CPC 4327                                        | South Africa, Minneola tangelo  | KP123899 |
| CBS 115200; CPC 4325                                        | South Africa, Minneola tangelo  | KP123900 |
| CBS 115616; EGS 34.016; CBS 916.96; CBS 110977T             | India, Arachis hypogaea         | AY563301 |
| CBS 116749                                                  | Netherlands, unknown            | KP123901 |
| CBS 117130                                                  | Italy, Arbutus unedo            | KP123902 |
| CBS 117143                                                  | Italy, Capsicum annuum          | KP123903 |
| CBS 118811; E.G.S. 35.158 (A. brassicinaeT)                 | USA, Brassica oleracea          | KP123904 |
| CBS 118812; E.G.S. 37.050 (A. daucifoliiT)                  | USA, Daucus carota              | KP123905 |
| CBS 118814; E.G.S. 44.048 (A. tomatocolaT)                  | USA, Solanum lycopersicum       | KP123906 |
| CBS 118815; E.G.S. 51.132 (A. tomatocolaR)                  | USA, Solanum lycopersicum       | KP123907 |
| CBS 118818; E.G.S. 31.032 (A. vacciniit)                    | USA, Vaccinium sp.              | KP123908 |
| CBS 119115                                                  | Greece, Prunus sp.              | KP123909 |
| CBS 119399; E.G.S. 39.189 (A. postmessiaT)                  | USA, Minneola tangelo           | KP123910 |
| CBS 119408; E.G.S. 40.140 (A. herbiphorbicolaT)             | USA, Euphorbia esula            | JQ646410 |
| CBS 119543; E.G.S. 12.160 (A. citricancriT)                 | USA, Citrus paradisi            | KP123911 |
| CBS 120829                                                  | Greece, Punica granatum         | KP123912 |
| CBS 121336; E.G.S. 37.005; ATCC 11680 (A. palanduiT)        | USA, Allium sp.                 | KJ862259 |
| CBS 121344; E.G.S. 45.003 (A. turkisafriaR)                 | Israel, Minneola tangelo        | KP123913 |
| CBS 121346; E.G.S. 45.056 (A. turkisafriaR)                 | South Africa, Minneola tangelo  | KP123914 |
| CBS 121348; E.G.S. 50.070 (A. platycodonisT)                | China, Platycodon grandiflorus  | KP123915 |
| CBS 121454; E.G.S. 46.069 (A. destruensT)                   | USA, Cuscuta gronovii           | JQ646402 |
| CBS 121455; E.G.S. 50.078 (A. broussonetiaeT)               | China, Broussonetia papyrifera  | KP123916 |
| CBS 121456; E.G.S. 50.080; HSAUP 9600197 (A. sanguisorbaeT) | China, Sanguisorba officinalis  | KP123917 |
| CBS 121492; HSAUP0207 (Ulocladium cucumisis)                | China, Cucumis melo             | KP123918 |
| CBS 121544; E.G.S. 38.022 (A. caudataR)                     | USA, Cucumis sativus            | KP123919 |
| CBS 121547; E.G.S. 50.048 (A. yali-inficiensT)              | China, Pyrus bretschneideri     | KP123920 |
| CBS 124277 (A. tenuissima)                                  | Denmark, Prunus sp.             | KP123921 |
| CBS 124278 (A. tenuissima)                                  | Denmark, Prunus sp.             | KP123922 |
| CBS 126071 (A. tenuissima)                                  | Namibia, soil                   | KP123924 |
| CBS 126072 (A. tenuissima)                                  | Namibia, soil                   | KP123925 |
| CBS 126908                                                  | USA, soil                       | KP123926 |

|                                                      |                                  |          |
|------------------------------------------------------|----------------------------------|----------|
| CBS 126910 (A. tenuis)                               | USA, soil                        | KP123927 |
| CBS 127334                                           | USA, soil                        | KP123928 |
| CBS 127671; E.G.S. 52.121 (A. seleniiphilaT)         | USA, Stanleya pinnata            | KP123929 |
| CBS 127672; E.G.S. 52.122 (A. astragaliT)            | USA, Astragalus bisulcatus       | KP123930 |
| CBS 130254                                           | India, human sputum              | KP123931 |
| CBS 130255                                           | India, human sputum              | KP123932 |
| CBS 130258                                           | India, human sputum              | KP123933 |
| CBS 130259                                           | India, human sputum              | KP123934 |
| CBS 130260                                           | India, human sputum              | KP123935 |
| CBS 130261                                           | India, human sputum              | KP123936 |
| CBS 130262                                           | India, human sputum              | KP123937 |
| CBS 130263                                           | India, human sputum              | KP123938 |
| CBS 130265                                           | India, human sputum              | KP123939 |
| <b><i>Alternaria arborescens</i> SC</b>              |                                  |          |
| CBS 101.13; E.G.S. 07.022; QM1765 (A. geophilaT)     | Switzerland, peat soil           | KP123940 |
| CBS 105.24; IHEM 3123 (A. alternata)                 | Unknown, Solanum tuberosum       | KP123941 |
| CBS 108.41; E.G.S. 44.087; ATCC 11892 (A. alternata) | Unknown, wood                    | KP123942 |
| CBS 113.41; IHEM 3318 (A. alternata)                 | Unknown, Schizanthus sp.         | KP123943 |
| CBS 105.49 (A. alternata)                            | Italy, contaminant blood culture | KP123944 |
| CBS 126.60; IMI 081622 (A. maritima)                 | UK, wood                         | JQ646390 |
| CBS 750.68; LCP 68.1989 (A. tenuissima)              | France, Phaseolus vulgaris       | KP123945 |
| CBS 102605; E.G.S. 39.128 (A. arborescensT)          | USA, Solanum lycopersicum        | AY563303 |
| CBS 109730 (A. arborescens)                          | USA, Solanum lycopersicum        | KP123946 |
| CBS 112633; CPC 4244 (A. arborescens)                | South Africa, Malus domestica    | KP123947 |
| CBS 115189; CPC 4345 (A. arborescens)                | South Africa, Citrus clementina  | KP123949 |
| CBS 115516; CPC 4247 (A. arborescens)                | South Africa, Malus domestica    | KP123950 |
| CBS 115517; CPC 4246 (A. arborescens)                | South Africa, Malus domestica    | KP123951 |
| CBS 119544; E.G.S. 43.072 (A. cerealisT)             | New Zealand, Avena sativa        | KP123955 |
| CBS 119545; E.G.S. 48.130 (A. senecionicolaT)        | New Zealand, Senecio skirrhodon  | KP123956 |
| CBS 124281 (A. arborescens)                          | Denmark, Triticum sp.            | KP123961 |
| CBS 124282 (A. arborescens)                          | Denmark, Hordeum vulgare         | KP123962 |
| CBS 124283 (A. tenuissima)                           | Russia, Oryza sp.                | KP123963 |
| CPC 25266                                            | Austria, Pyrus sp.               | KP123965 |
| <b><i>Alternaria burnsii</i></b>                     |                                  |          |
| CBS 107.38; E.G.S. 06.185T                           | India, Cuminum cyminum           | KP123967 |
| CBS 110.50; MUCL 10012 (A. gossypina)                | Mozambique, Gossypium sp.        | KP123968 |
| <b><i>Alternaria gossypina</i></b>                   |                                  |          |
| CBS 102597; E.G.S. 45.114 (A. tangelonisT)           | USA, Minneola tangelo            | KP123978 |
| CBS 102601; E.G.S. 45.017 (A. colombianaT)           | Colombia, Minneola tangelo       | KP123979 |
| <b><i>Alternaria jacinthicola</i></b>                |                                  |          |
| CBS 133751; MUCL 53159T                              | Mali, Eichhornia crassipes       | KP123984 |
| <b><i>Alternaria longipes</i></b>                    |                                  |          |
| CBS 113.35                                           | Unknown, Nicotiana tabacum       | KP123986 |
| CBS 121332; E.G.S. 30.048R                           | USA, Nicotiana tabacum           | KP123989 |

Abbreviation: (T): ex-type isolate; (R): representative isolate; Species names between parentheses refer to the former species name, Bold accession numbers are generated in other studies; np: no product.



**Supplementary Table S3.** PCR - RFLP profile of *Alt a1* gene region of *Alternaria alternata* isolates after digestion with two different restriction enzymes

| Number of <i>Alternaria alternata</i> Isolate | <i>Alternaria alternata</i> Isolates                                                                                                                                                                                                                                                                                                                                                                                                                                                                                                                                                                                                                                                                                                                                                                                                                                                                                                                                                                                                                                                                                                                                                                                                                                                                                                                                      | PCR Amplicon (bp) | Restriction Fragments (bp) |                   | Restriction Pattern (A - D) |
|-----------------------------------------------|---------------------------------------------------------------------------------------------------------------------------------------------------------------------------------------------------------------------------------------------------------------------------------------------------------------------------------------------------------------------------------------------------------------------------------------------------------------------------------------------------------------------------------------------------------------------------------------------------------------------------------------------------------------------------------------------------------------------------------------------------------------------------------------------------------------------------------------------------------------------------------------------------------------------------------------------------------------------------------------------------------------------------------------------------------------------------------------------------------------------------------------------------------------------------------------------------------------------------------------------------------------------------------------------------------------------------------------------------------------------------|-------------------|----------------------------|-------------------|-----------------------------|
|                                               |                                                                                                                                                                                                                                                                                                                                                                                                                                                                                                                                                                                                                                                                                                                                                                                                                                                                                                                                                                                                                                                                                                                                                                                                                                                                                                                                                                           |                   | <i>HaeIII</i> (pb)         | <i>HinfI</i> (pb) |                             |
| 31                                            | CGJM 3112, CGJM 3028, CGJM 3125, CGJM 3105, CGJM 3064, CGJM 3070, CGJM 3017, CGJM 2965, CGJM 3114, CGJM 3101, CGJM 3069, CGJM 2984, CGJM 3062, CGJM 3063, CGJM 3127, CGJM 2979, CGJM 3161, CGJM 3116, CGJM 3171, CGJM 3150, CGJM 3149, CGJM 3173, CGJM 3546, CGJM 3547, CGJM 3551, CGJM 3115, CGJM 2973, CGJM 2974, CGJM 3124, CGJM 2954, CGJM 3138                                                                                                                                                                                                                                                                                                                                                                                                                                                                                                                                                                                                                                                                                                                                                                                                                                                                                                                                                                                                                       | 980               | 600                        | -                 | <b>A</b>                    |
| 62                                            | GJM 3027, CGJM 3108, CGJM 3079, CGJM 3030, CGJM 3142, CGJM 3054, CGJM 3055, CGJM 2956, CGJM 3139, CGJM 3041, CGJM 3029, CGJM 3130, CGJM 3071, CGJM 3072, CGJM 3168, CGJM 3104, CGJM 3002, CGJM 3003, CGJM 3145, CGJM 2975, CGJM 3153, CGJM 3007, CGJM 3169, CGJM 3008, CGJM 3009, CGJM 2952, CGJM 2962, CGJM 2963, CGJM 2970, CGJM 3129, CGJM 3001, CGJM 2995, CGJM 2992, CGJM 2968, CGJM 2971, CGJM 2994, CGJM 3011, CGJM 3018, CGJM 3014, CGJM 3015, CGJM 3013, CGJM 3019, CGJM 3035, CGJM 3020, CGJM 3077, CGJM 3000, CGJM 3004, CGJM 3073, CGJM 2983, CGJM 3046, CGJM 3177, CGJM 3010, CGJM 3118, CGJM 2998, CGJM 3120, CGJM 3128, CGJM 2978, CGJM 3100, CGJM 3099, CGJM 3083, CGJM 3165, CGJM 3162                                                                                                                                                                                                                                                                                                                                                                                                                                                                                                                                                                                                                                                                   | 980               | 310 + 200                  | -                 | <b>B</b>                    |
| 122                                           | CGJM 3107, CGJM 3053, CGJM 3119, CGJM 3057, CGJM 2955, CGJM 3109, CGJM 3126, CGJM 3120, CGJM 3154, CGJM 3067, CGJM 3091, CGJM 3084, CGJM 3160, CGJM 3123, CGJM 3061, CGJM 3005, CGJM 3047, CGJM 3111, CGJM 3051, CGJM 3024, CGJM 3050, CGJM 2964, CGJM 3033, CGJM 3093, CGJM 3049, CGJM 3037, CGJM 3052, CGJM 3048, CGJM 3131, CGJM 3164, CGJM 3045, CGJM 3065, CGJM 3039, CGJM 3166, CGJM 3141, CGJM 3034, CGJM 2977, CGJM 3096, CGJM 3068, CGJM 2993, CGJM 2999, CGJM 2982, CGJM 3023, CGJM 3022, CGJM 3106, CGJM 3012, CGJM 3075, CGJM 3038, CGJM 2980, CGJM 3086, CGJM 2976, CGJM 3016, CGJM 3170, CGJM 3117, CGJM 3156, CGJM 3152, CGJM 3157, CGJM 3146, CGJM 3133, CGJM 3151, CGJM 3172, CGJM 3136, CGJM 3135, CGJM 3134, CGJM 3148, CGJM 3147, CGJM 3174, CGJM 3158, CGJM 3159, CGJM 3175, CGJM 3082, CGJM 3088, CGJM 3094, CGJM 3092, CGJM 3176, CGJM 1A, CGJM 3081, CGJM 1B, CGJM 3167, CGJM 1C, CGJM1D, CGJM 1E, CGJM 1F, CGJM 3155, CGJM 1G, CGJM 3143, CGJM 1H, CGJM 1I, CGJM 3535, CGJM 3536, CGJM 3537, CGJM 3538, CGJM 3539, CGJM 3540, CGJM 3541, CGJM 3542, CGJM 3543, CGJM 3544, CGJM 3545, CGJM 3548, CGJM 3549, CGJM 3550, CGJM 3552, CGJM 3553, CGJM 3554, CGJM 3555, CGJM 3556, CGJM 3557, CGJM 3558, CGJM 3559, CGJM 3560, CGJM 3561, CGJM 3562, CGJM 2986, CGJM 3032, CGJM 3044, CGJM 3085, CGJM 3026, CGJM 3128, CGJM 2978, CGJM 3100, CGJM 3099 | 980               | 410                        | -                 | <b>C</b>                    |
| 5                                             | CGJM 3163, CGJM 2960, CGJM 2961, CGJM 2953, CGJM 2990                                                                                                                                                                                                                                                                                                                                                                                                                                                                                                                                                                                                                                                                                                                                                                                                                                                                                                                                                                                                                                                                                                                                                                                                                                                                                                                     | 980               | 600+310+200                | -                 | <b>D</b>                    |

**Table S3.**  
(continued)

| Number of<br><i>Alternaria</i><br><i>alternata</i><br>Isolate | <i>Alternaria alternata</i> Isolates                                                                                                                                                                                                                                                                                                                                                                                                                                                                                                                                                                                                                                                                                                                                                                                                                                                                                                                                                                                                                                                                                                                                                                                                                                                                                                                                                                                                                                                                                                                                                                                                                                                                                                                                        | PCR<br>Amplicon<br>(bp) | Restriction Fragments<br>(bp) |                   | Restriction<br>Pattern<br>(E - F) |
|---------------------------------------------------------------|-----------------------------------------------------------------------------------------------------------------------------------------------------------------------------------------------------------------------------------------------------------------------------------------------------------------------------------------------------------------------------------------------------------------------------------------------------------------------------------------------------------------------------------------------------------------------------------------------------------------------------------------------------------------------------------------------------------------------------------------------------------------------------------------------------------------------------------------------------------------------------------------------------------------------------------------------------------------------------------------------------------------------------------------------------------------------------------------------------------------------------------------------------------------------------------------------------------------------------------------------------------------------------------------------------------------------------------------------------------------------------------------------------------------------------------------------------------------------------------------------------------------------------------------------------------------------------------------------------------------------------------------------------------------------------------------------------------------------------------------------------------------------------|-------------------------|-------------------------------|-------------------|-----------------------------------|
|                                                               |                                                                                                                                                                                                                                                                                                                                                                                                                                                                                                                                                                                                                                                                                                                                                                                                                                                                                                                                                                                                                                                                                                                                                                                                                                                                                                                                                                                                                                                                                                                                                                                                                                                                                                                                                                             |                         | <i>HaeIII</i><br>(pb)         | <i>Hinfl</i> (pb) |                                   |
| 2                                                             | CGJM 2985, CGJM 3040                                                                                                                                                                                                                                                                                                                                                                                                                                                                                                                                                                                                                                                                                                                                                                                                                                                                                                                                                                                                                                                                                                                                                                                                                                                                                                                                                                                                                                                                                                                                                                                                                                                                                                                                                        | 980                     | 410+180                       | -                 |                                   |
| 64                                                            | CGJM 2973, CGJM 2974, CGJM 3124, CGJM 2954, CGJM 2985, CGJM 3040, CGJM 3027, CGJM 3108, CGJM 3079, CGJM 3030, CGJM 3142, CGJM 3054, CGJM 3055, CGJM 2956, CGJM 3139, CGJM 3041, CGJM 3029, CGJM 3130, CGJM 3071, CGJM 3072, CGJM 3168, CGJM 3104, CGJM 3002, CGJM 3003, CGJM 3145, CGJM 2975, CGJM 3153, CGJM 3007, CGJM 3169, CGJM 3008, CGJM 3009, CGJM 2952, CGJM 2962, CGJM 2963, CGJM 2970, CGJM 3129, CGJM 3001, CGJM 2995, CGJM 2992, CGJM 2968, CGJM 2971, CGJM 2994, CGJM 3011, CGJM 3018, CGJM 3014, CGJM 3015, CGJM 3013, CGJM 3019, CGJM 3035, CGJM 3020, CGJM 3077, CGJM 3000, CGJM 3004, CGJM 3073, CGJM 2983, CGJM 3046, CGJM 3177, CGJM 3010, CGJM 3118, CGJM 2998, CGJM 3120, CGJM 2986, CGJM 3032, CGJM 3044                                                                                                                                                                                                                                                                                                                                                                                                                                                                                                                                                                                                                                                                                                                                                                                                                                                                                                                                                                                                                                              | 980                     | -                             | 410+180           | E                                 |
| 158                                                           | CGJM 3112, CGJM 3028, CGJM 3125, CGJM 3105, CGJM 3064, CGJM 3070, CGJM 3017, CGJM 2965, CGJM 3114, CGJM 3101, CGJM 3069, CGJM 2984, CGJM 3062, CGJM 3063, CGJM 3127, CGJM 2979, CGJM 3161, CGJM 3116, CGJM 3171, CGJM 3150, CGJM 3149, CGJM 3173, CGJM 3546, CGJM 3547, CGJM 3551, CGJM 3115, CGJM 2973, CGJM 2974, CGJM 3124, CGJM 2954, CGJM 3138, CGJM 3163, CGJM 2960, CGJM 2961, CGJM 2953, CGJM 2990, CGJM 3107, CGJM 3053, CGJM 3119, CGJM 3057, CGJM 2955, CGJM 3109, CGJM 3126, CGJM 3120, CGJM 3154, CGJM 3067, CGJM 3091, CGJM 3084, CGJM 3160, CGJM 3123, CGJM 3061, CGJM 3005, CGJM 3047, CGJM 3111, CGJM 3051, CGJM 3024, CGJM 3050, CGJM 2964, CGJM 3033, CGJM 3093, CGJM 3049, CGJM 3037, CGJM 3052, CGJM 3048, CGJM 3131, CGJM 3164, CGJM 3045, CGJM 3065, CGJM 3039, CGJM 3166, CGJM 3141, CGJM 3034, CGJM 2977, CGJM 3096, CGJM 3068, CGJM 2993, CGJM 2999, CGJM 2982, CGJM 3023, CGJM 3022, CGJM 3106, CGJM 3012, CGJM 3075, CGJM 3038, CGJM 2980, CGJM 3086, CGJM 2976, CGJM 3016, CGJM 3170, CGJM 3117, CGJM 3156, CGJM 3152, CGJM 3157, CGJM 3146, CGJM 3133, CGJM 3151, CGJM 3172, CGJM 3136, CGJM 3135, CGJM 3134, CGJM 3148, CGJM 3147, CGJM 3174, CGJM 3158, CGJM 3159, CGJM 3175, CGJM 3082, CGJM 3088, CGJM 3094, CGJM 3092, CGJM 3176, CGJM 1A, CGJM 3081, CGJM 1B, CGJM 3167, CGJM 1C, CGJM 1D, CGJM 1E, CGJM 1F, CGJM 3155, CGJM 1G, CGJM 3143, CGJM 1H, CGJM 1I, CGJM 3535, CGJM 3536, CGJM 3537, CGJM 3538, CGJM 3539, CGJM 3540, CGJM 3541, CGJM 3542, CGJM 3543, CGJM 3544, CGJM 3545, CGJM 3548, CGJM 3549, CGJM 3550, CGJM 3552, CGJM 3553, CGJM 3554, CGJM 3555, CGJM 3556, CGJM 3557, CGJM 3558, CGJM 3559, CGJM 3560, CGJM 3561, CGJM 3562, CGJM 3085, CGJM 3026, CGJM 3128, CGJM 2978, CGJM 3100, CGJM 3083, CGJM 3165, CGJM 3162 | 980                     | -                             | 400+200+110       | F                                 |
