# Supplementary material for: Differential Detection of Alternaria alternata Haplotypes Isolated from Carya illinoinensis Using PCR-RFLP Analysis of Alt a1 Gene Region
Source: MDPI journal article supplement (doi:10.3390/genes14051115), 2023-05-20
Supplement: s1 [file s1]

## Supplementary Figure S1

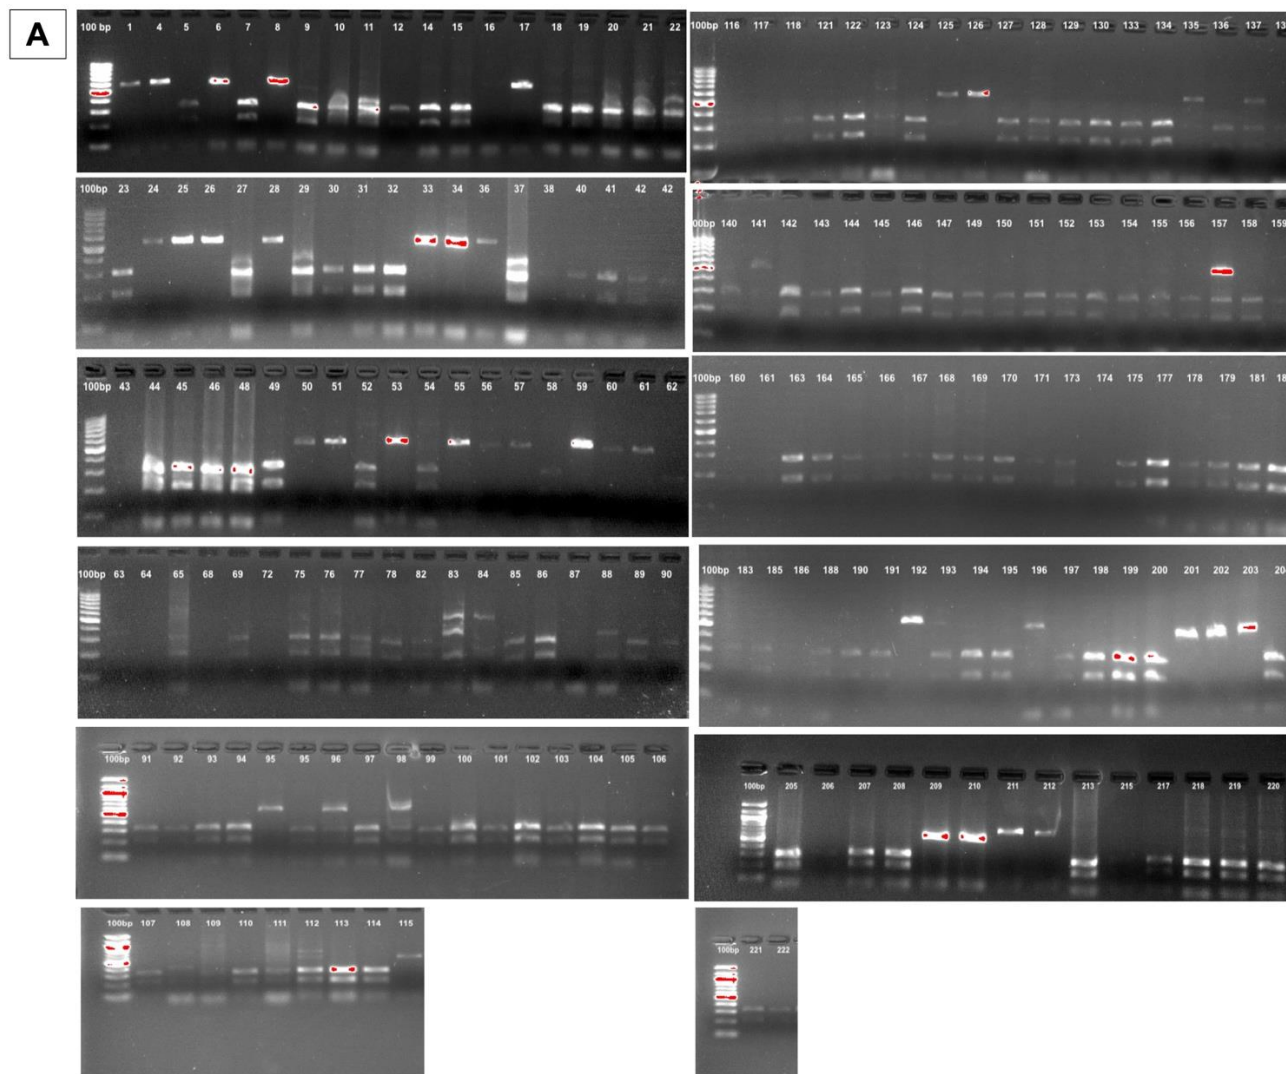

**Supplementary Figure S1A.** RFLP profiles of *Alt a1* DNA PCR products of 222 *Alternata alternata* isolates using *Hae*III endonuclease digestion, Lane 1: (100 bp) Molecular weight marker (Thermo Fisher Scientific, Massachusetts, USA).

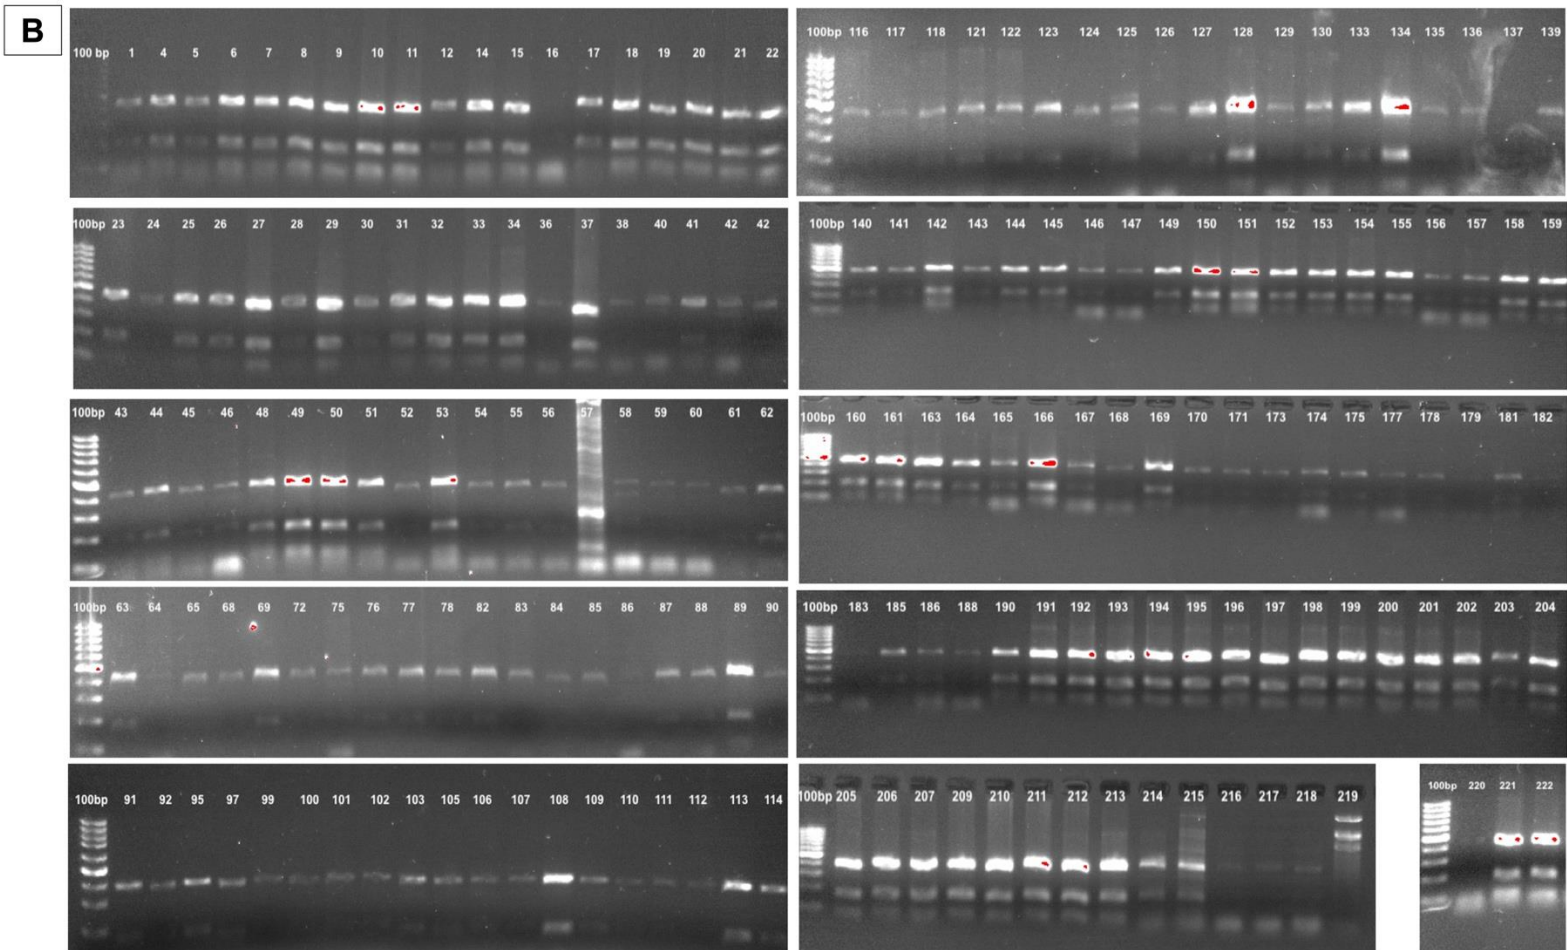

**Supplementary Figure S1B.** RFLP profiles of *Alt a1* DNA PCR products of 222 *Alternata alternata* isolates using *HinfI* endonuclease digestion, Lane 1: (100 bp) Molecular weight marker (Thermo Fisher Scientific, Massachusetts, USA).
